# Supplementary material for: All‐Inkjet‐Printed 3D Alveolar Barrier Model with Physiologically Relevant Microarchitecture
Source: PubMed Central journal article supplement (PMC8132150; doi:10.1002/advs.202004990), 2021-03-08
Supplement: ADVS-8-2004990-s001.pdf [file ADVS-8-2004990-s001.pdf]

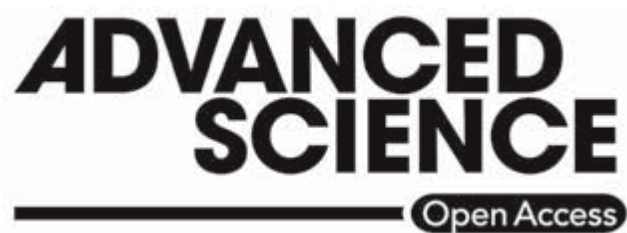

## Supporting Information

for *Adv. Sci.*, DOI: 10.1002/advs.202004990

### **All-Inkjet-Printed 3D Alveolar Barrier Model with Physiologically Relevant Microarchitecture**

*Dayoon Kang, Ju An Park, Woojo Kim, Seongju Kim, Hwa-Rim Lee\*, Woo-Jong Kim, Joo-Yeon Yoo, and Sungjune Jung\**

## Supporting Information

**All-Inkjet-Printed 3D Alveolar Barrier Model with Physiologically Relevant Microarchitecture**

*Dayoon Kang, Ju An Park, Woojo Kim, Seongju Kim, Hwa-Rim Lee\*, Woo-Jong Kim, Joo-Yeon Yoo, and Sungjune Jung\**

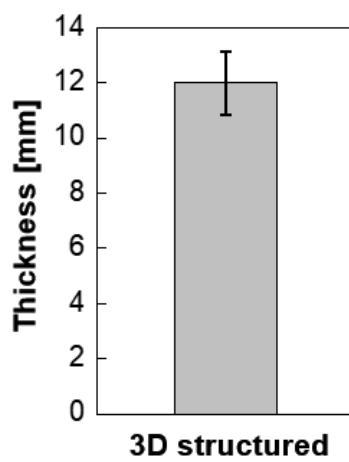

**Figure S1. Evaluation of thickness of fabricated 3D structured model** The thickness of 3D structured model were accurately measured by a stylus surface profiler before tissue fixation and freezing ( $n=5$ ).

**Table S1. Antibody list**

| Antibody name                                         | Ratio  | Serial number; Company            |
|-------------------------------------------------------|--------|-----------------------------------|
| Anti-laminin                                          | 1:1000 | ab11575; Abcam                    |
| Anti-cluster of differentiation 31 (CD31)             | 1:1000 | ab28364; Abcam                    |
| Anti-zonula occludens-1 (ZO-1)                        | 1:1000 | 61-7300; Thermo Fisher Scientific |
| Anti-collagen IV                                      | 1:1000 | ab6586; Abcam                     |
| Anti-surfactant protein A                             | 1:500  | ab87674; Abcam                    |
| Goat anti-Rabbit secondary antibody, Alexa Fluor® 488 | 1:200  | a11034; Thermo Fisher Scientific  |

**Table S2. qPCR primer list**

| Target gene                                                  | Primer sequence (5' → 3')      |
|--------------------------------------------------------------|--------------------------------|
| ZO-1 (TJP1)                                                  | F: GCGGTCAGAGCCTTCTGATC        |
|                                                              | R: CATGCTTTACAGGAGTTGAGACAG    |
| E-cadherin (CDH1)                                            | F: GCTGGACCGAGAGAGTTTCC        |
|                                                              | R: GGTGTATACAGCCTCCCACG        |
| Occludin (OCLN)                                              | F: TCAGGGAATATCCACCTATCACTTCAG |
|                                                              | R: CATCAGCAGCAGCCATGTACTCTTCAC |
| SP-A (SFTPA2)                                                | F: TTGGAGCCTGAAAAGAAGGA        |
|                                                              | R: GGCTTGGAGCTCCTCATCTA        |
| SP-B (SFTPB)                                                 | F: AGGTGGACTTCCAGCTTTTGAT      |
|                                                              | R: CAGCACTTTAAAGGACGGTGTC      |
| $\alpha$ -ENaC (SCNN1A)                                      | F: CTTTGGCATGATGTACTGGCA       |
|                                                              | R: GGAAGACGAGCTTGCCGAGT        |
| $\beta$ -ENaC (SCNN1B)                                       | F: GAGCCCTGCAACTACCGGA         |
|                                                              | R: GCCGAAGGAAGTGCCTTCTC        |
| $\alpha_1$ -Na <sup>+</sup> -K <sup>+</sup> -ATPase (ATP1A1) | F: AGTTGCAGGAGATGCCTCTGA       |
|                                                              | R: TCTCGACGATTTTGCGTATC        |
| GAPDH                                                        | F: CTCCTCTGACTTCAACAGCGACA     |
|                                                              | R: GAGGGTCTCTCTTCTCTTGT        |
| Influenza M1                                                 | F: TCTGATCCTCTCGTCATTGCAGCAA   |
|                                                              | R: AATGACCATCGTCAACATCCACAGC   |
| interferon- $\beta$                                          | F: TGCTCTCCTGTTGTGCTTCTCC      |
|                                                              | R: CATCTCATAGATGGTCAATGCGG     |
| ISG15                                                        | F: CCTCTGAGCATCCTGGT           |
|                                                              | R: AGGCCGTACTCCCCCAG           |
| OAS1                                                         | F: TCAGAAATACCCAGCCAAA         |
|                                                              | R: GAGCCACCCTTTACCACCTT        |
| 18S rRNA                                                     | F: CGCCGCGCTCTACCTTACCT        |
|                                                              | R: TAGGAGAGGAGCGAGCGACC        |
